# Supplementary material for: Divergent Effects of Glycemic Control and Bariatric Surgery on Circulating Concentrations of TMAO in Newly Diagnosed T2D Patients and Morbidly Obese
Source: Preprints.org preprint supplement (doi:10.20944/preprints202209.0195.v1), 2022-09-14
Supplement: Supplementary file 2 [file supplementary]

**Table S1.** SRM transitions and collision energies used in LC-MS/MS for the detection of TMAO, γBB and d3-MeCar(IS)

| Compound | Transition | Collision energy |
| --- | --- | --- |
| TMAO | 76 🡪 58 | 16 |
| TMAO | 76 🡪 59 | 8 |
| γBB | 146 🡪 87 | 16 |
| γBB | 146 🡪 60 | 12 |
| d3-MeCar (IS) | 165 🡪 63 | 16 |
| d3-MeCar (IS) | 165 🡪 103 | 16 |
